# Supplementary material for: Whole-Genome Sequencing Reveals Recent Transmission of Multidrug-Resistant Mycobacterium tuberculosis CAS1-Kili Strains in Lusaka, Zambia
Source: MDPI journal article supplement (doi:10.3390/antibiotics11010029), 2021-12-28
Supplement: s1 [file s1]

## Supplementary Materials

Supplementary Figure S1: Nucleotide changes in drug-resistance-associated genes and number of strains having the same nucleotide change among the 12 SIT21/CAS1-Kili strains. The strain IDs are arranged in relation to Figure 1 (starting from the top). Fs in the table represents frameshift.

| Drug         | Gene        | Mutation         | Nucleotide change | Number of strains | Strain ID |     |     |     |     |     |     |     |     |     |     |     |
|--------------|-------------|------------------|-------------------|-------------------|-----------|-----|-----|-----|-----|-----|-----|-----|-----|-----|-----|-----|
|              |             |                  |                   |                   | S04       | S07 | S11 | S05 | S13 | S12 | S03 | S01 | S10 | S08 | S09 | S06 |
| Rifampicin   | <i>rpoB</i> | Ser450Leu        | TCG > TTG         | 4                 |           |     |     |     |     |     |     |     |     |     |     |     |
|              |             | His445Tyr        | CAC > TAC         | 2                 |           |     |     |     |     |     |     |     |     |     |     |     |
|              |             | His445Asp        | CAC > GAC         | 2                 |           |     |     |     |     |     |     |     |     |     |     |     |
|              |             | His445Arg        | CAC > CGC         | 1                 |           |     |     |     |     |     |     |     |     |     |     |     |
|              |             | Ser441Val        | TCG > GTG         | 1                 |           |     |     |     |     |     |     |     |     |     |     |     |
|              |             | Ser428Ile        | AGC > ATC         | 1                 |           |     |     |     |     |     |     |     |     |     |     |     |
|              |             | Asp435del        | GAC > ---         | 4                 |           |     |     |     |     |     |     |     |     |     |     |     |
|              |             | Thr1047Ile       | ACC > ATC         | 3                 |           |     |     |     |     |     |     |     |     |     |     |     |
|              | <i>rpoC</i> | Val483Ala        | GTG > GCG         | 2                 |           |     |     |     |     |     |     |     |     |     |     |     |
|              |             | Val483Gly        | GTG > GGG         | 2                 |           |     |     |     |     |     |     |     |     |     |     |     |
|              |             | Trp105Arg        | TGG > CGG         | 1                 |           |     |     |     |     |     |     |     |     |     |     |     |
| Isoniazid    | <i>katG</i> | Ser315Thr        | AGC > ACC         | 13                |           |     |     |     |     |     |     |     |     |     |     |     |
| Streptomycin | <i>rpsL</i> | Lys43Arg         | AAG > AGG         | 4                 |           |     |     |     |     |     |     |     |     |     |     |     |
|              | <i>rrs</i>  | 517c>t           | C > T             | 1                 |           |     |     |     |     |     |     |     |     |     |     |     |
|              | <i>gid</i>  | Arg118Fs         | 351del            | 3                 |           |     |     |     |     |     |     |     |     |     |     |     |
|              |             | Leu35Fs          | 102del            | 1                 |           |     |     |     |     |     |     |     |     |     |     |     |
|              |             | Arg39Fs          | 115del            | 4                 |           |     |     |     |     |     |     |     |     |     |     |     |
| Ethambutol   | <i>embB</i> | Met306Ile        | ATG > ATA         | 11                |           |     |     |     |     |     |     |     |     |     |     |     |
|              |             | Met306Leu        | ATG > TTG         | 1                 |           |     |     |     |     |     |     |     |     |     |     |     |
|              |             | Gln497Lys        | CAG > AAG         | 1                 |           |     |     |     |     |     |     |     |     |     |     |     |
|              | <i>embA</i> | -11C>A           | C > A             | 1                 |           |     |     |     |     |     |     |     |     |     |     |     |
|              |             | -35A>del         | A > del           | 1                 |           |     |     |     |     |     |     |     |     |     |     |     |
|              |             | -16C>T           | C > T             | 2                 |           |     |     |     |     |     |     |     |     |     |     |     |
|              |             | -16C>G           | C > G             | 1                 |           |     |     |     |     |     |     |     |     |     |     |     |
| Pyrazinamide | <i>pncA</i> | Met175Val        | ATG > GTG         | 4                 |           |     |     |     |     |     |     |     |     |     |     |     |
|              |             | Glu127-Asp129del | 380 - 388del      | 1                 |           |     |     |     |     |     |     |     |     |     |     |     |

Supplementary Figure S2: Comparison of median SNP distances of global representative L3.1.1 strains by country to Zambian strains. The differences in median SNP distance were significant ( $p < 0.000$ ). Only countries with more than 10 strains were considered.

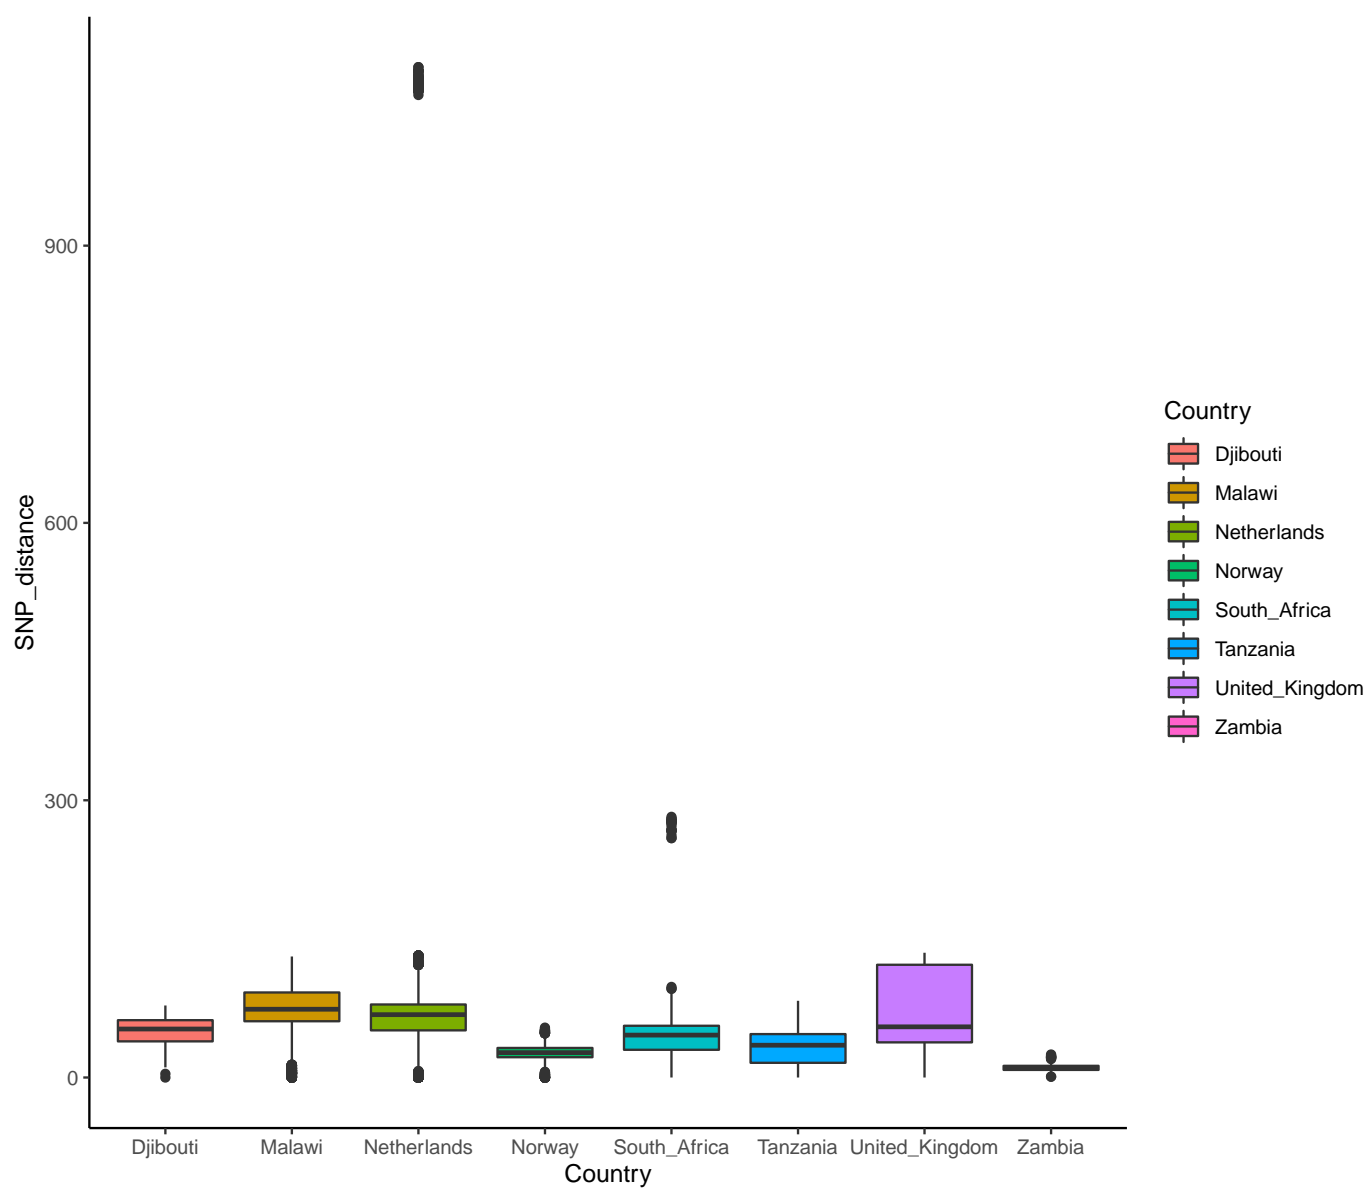

Supplementary Figure S3. Map showing the residence districts of the 12 patients highlighted in different colors. Seven patients were from Lusaka, and one from Chikankata. Monze and Kabwe had two patients each.

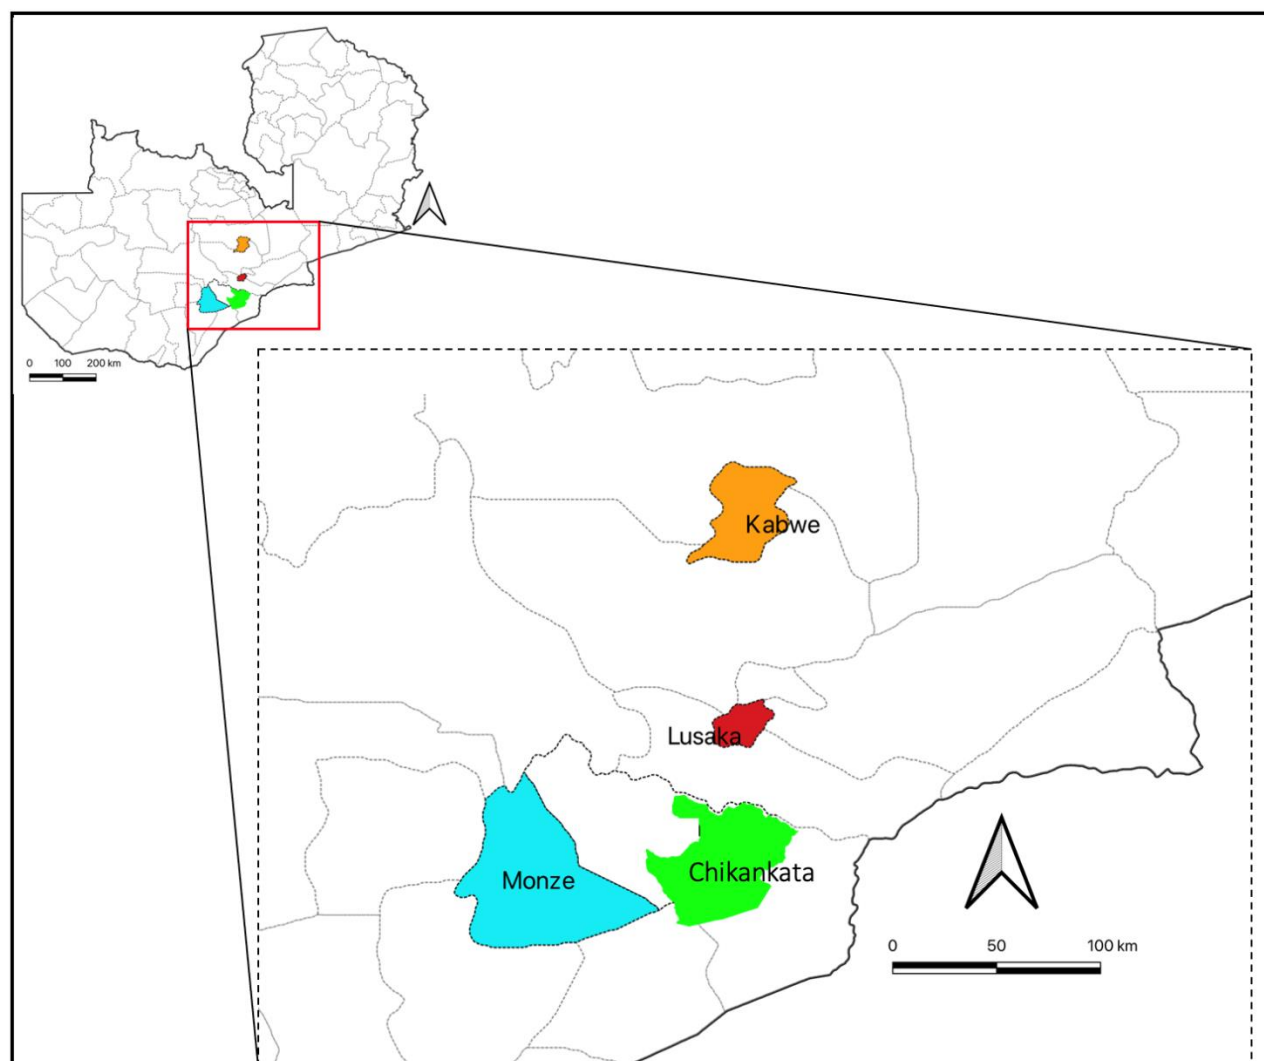

Supplementary Table S1: Number of L3.1.1 global strains from each country that were successfully analyzed.

| Country        | Susceptible | Pre-MDR   | MDR       | Others   | Total      |
|----------------|-------------|-----------|-----------|----------|------------|
| Canada         | 5           |           |           |          | 5          |
| United Kingdom | 48          | 1         | 1         | 1        | 51         |
| Finland        | 3           |           | 1         |          | 4          |
| Norway         | 69          | 8         | 3         | 6        | 86         |
| Netherlands    | 88          | 5         | 6         |          | 99         |
| Sweden         | 1           |           | 4         |          | 5          |
| Saudi Arabia   | 2           |           |           |          | 2          |
| Djibouti       | 5           | 2         | 5         |          | 12         |
| Uganda         | 1           | 1         | 2         |          | 4          |
| Malawi         | 119         | 15        |           |          | 134        |
| Tanzania       | 16          | 3         | 17        |          | 36         |
| Zambia         |             |           | 12        |          | 12         |
| South Africa   | 12          | 1         | 9         | 1        | 23         |
| Sudan          | 6           |           |           | 1        | 7          |
| <b>Total</b>   | <b>375</b>  | <b>36</b> | <b>60</b> | <b>9</b> | <b>480</b> |

Supplementary Table S2: Information on the 12 CAS1-Kili Zambian strains.

| Sample Number | Mean Coverage | Standard deviation | Mean read length | Total sequences | Number of reads |
|---------------|---------------|--------------------|------------------|-----------------|-----------------|
| S1            | 63.75         | $\pm 17.34$        | 249.97           | 579110          | 1,224,370       |
| S3            | 139.32        | $\pm 39.43$        | 209.31           | 1522426         | 3,195,791       |
| S4            | 35.73         | $\pm 21.4$         | 260.14           | 318802          | 750,634         |
| S5            | 118.74        | $\pm 36.57$        | 178.23           | 1534056         | 3,292,956       |
| S6            | 46.17         | $\pm 15.43$        | 250.57           | 426310          | 900,458         |
| S7            | 111.68        | $\pm 27.18$        | 167.49           | 1550554         | 3,334,987       |
| S8            | 43.29         | $\pm 13.69$        | 254.62           | 387347          | 799,903         |
| S9            | 44.75         | 16.08              | 250.83           | 415133          | 868,824         |
| S10           | 73.28         | $\pm 20.76$        | 278.31           | 604304          | 1,252,391       |
| S11           | 75.05         | $\pm 21.14$        | 266.89           | 641298          | 1,345,606       |
| S12           | 76.3          | $\pm 21.52$        | 271.42           | 644606          | 1,347,590       |
| S13           | 99.68         | $\pm 25.76$        | 212.6            | 1066338         | 2,159,212       |
